# Supplementary material for: Phytotoxic and Antifungal Metabolites from Curvularia crepinii QTYC-1 Isolated from the Gut of Pantala flavescens
Source: MDPI journal article supplement (doi:10.3390/molecules23040951), 2018-04-19
Supplement: s1 [file s1]

## Supplementary Materials:

### Phytotoxic and Antifungal Metabolites from *Curvularia crepinii* QTYC-1 Isolated from the Gut of *Pantala flavescens*

Caiping Yin, Liping Jin, Feifei Sun, Xiao Xu, Mingwei Shao, Ying-Lao Zhang

Figure S1.  $^1\text{H}$ -NMR spectrum (600 MHz) of the compound **2** in Acetone- $d_6$ .

Figure S2.  $^{13}\text{C}$ -NMR spectrum (150 MHz) of compound **2** in Acetone- $d_6$ .

Figure S3. DEPT 135 spectrum of compound **2** in Acetone- $d_6$ .

Figure S4.  $^1\text{H}$ - $^1\text{H}$  COSY spectrum of compound **2** in Acetone- $d_6$ .

Figure S5. HMQC spectrum of compound **2** in Acetone- $d_6$ .

Figure S6. HMBC spectrum of compound **2** in Acetone- $d_6$ .

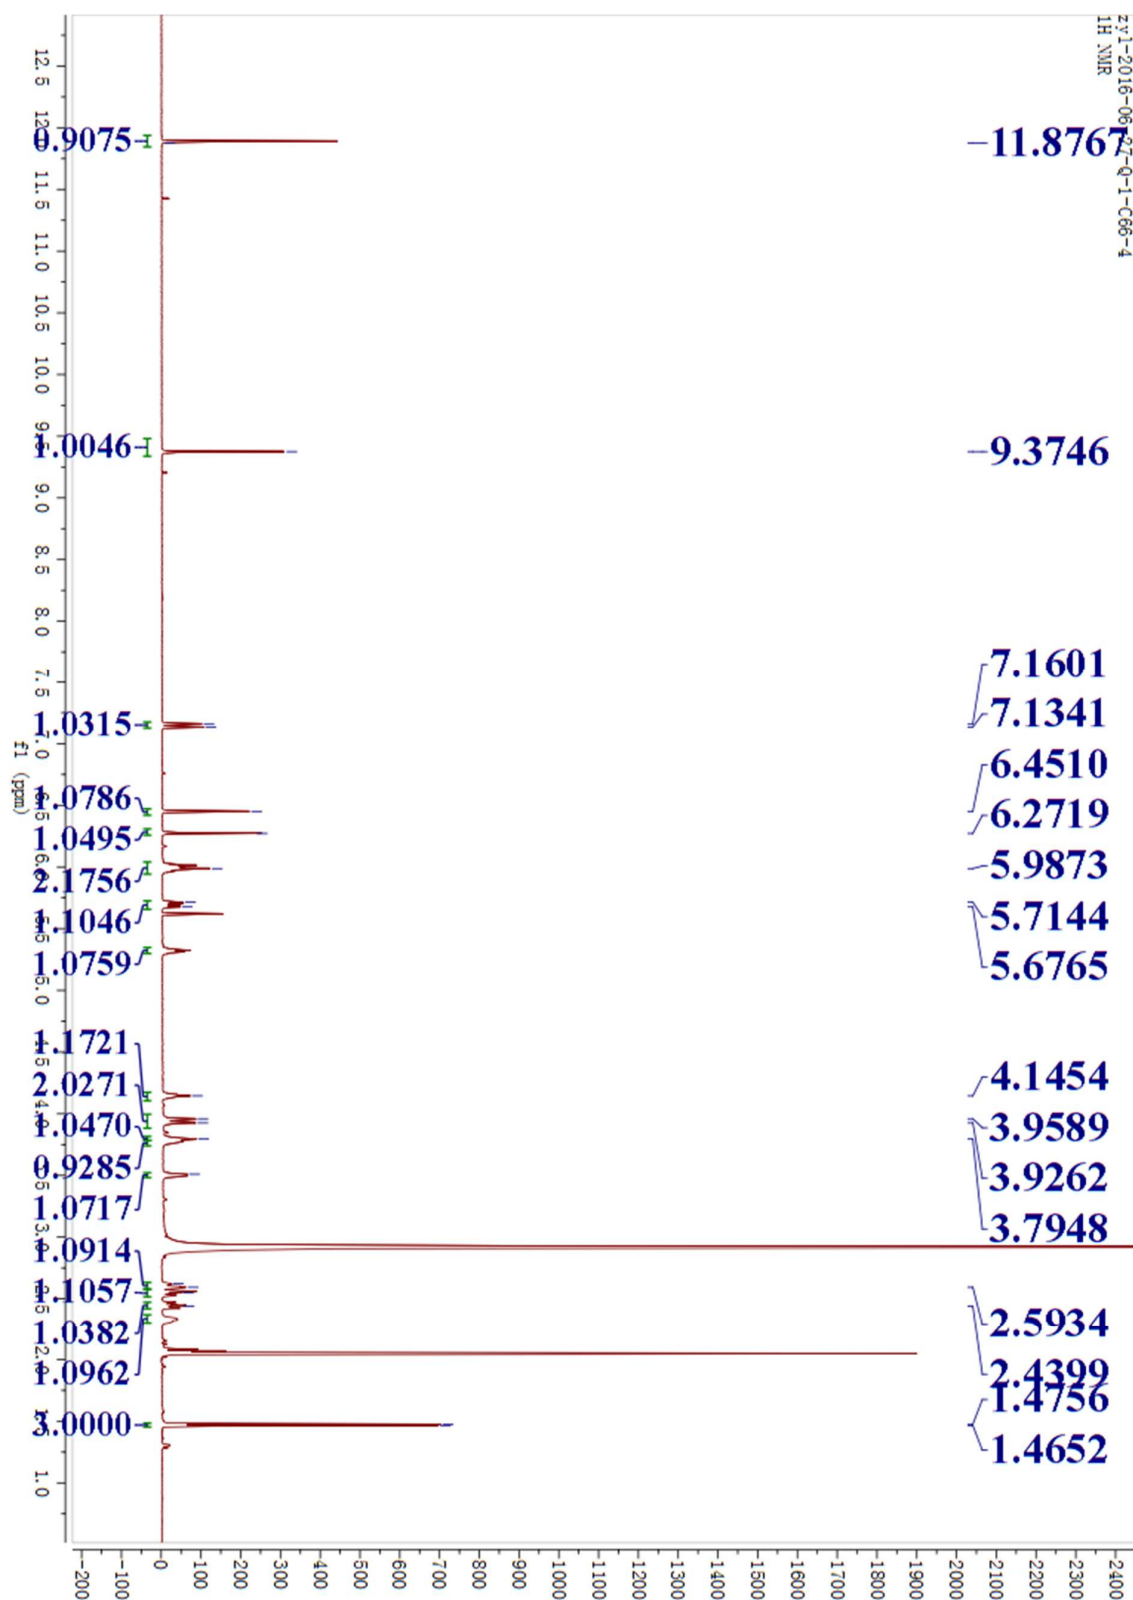

Figure S1.  $^1\text{H}$ -NMR spectrum (600 MHz) of the compound **2** in Acetone- $d_6$ .

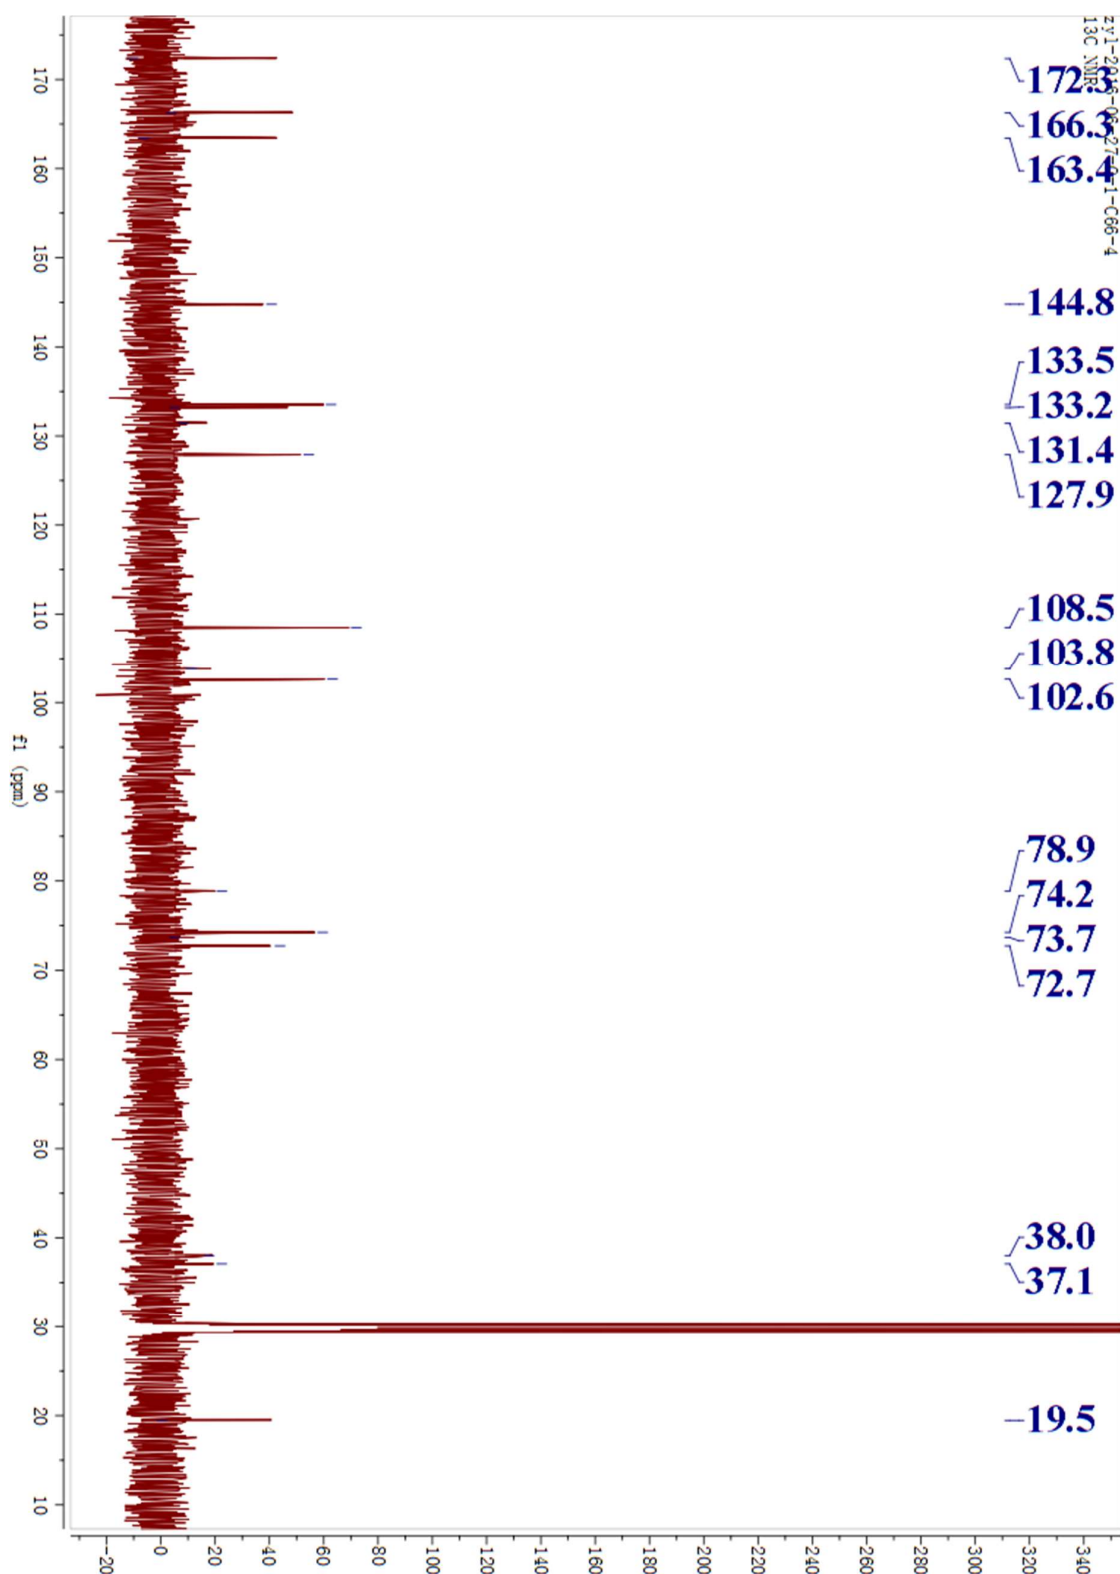

Figure S2.  $^{13}\text{C}$ -NMR spectrum (150 MHz) of compound **2** in Acetone- $d_6$ .

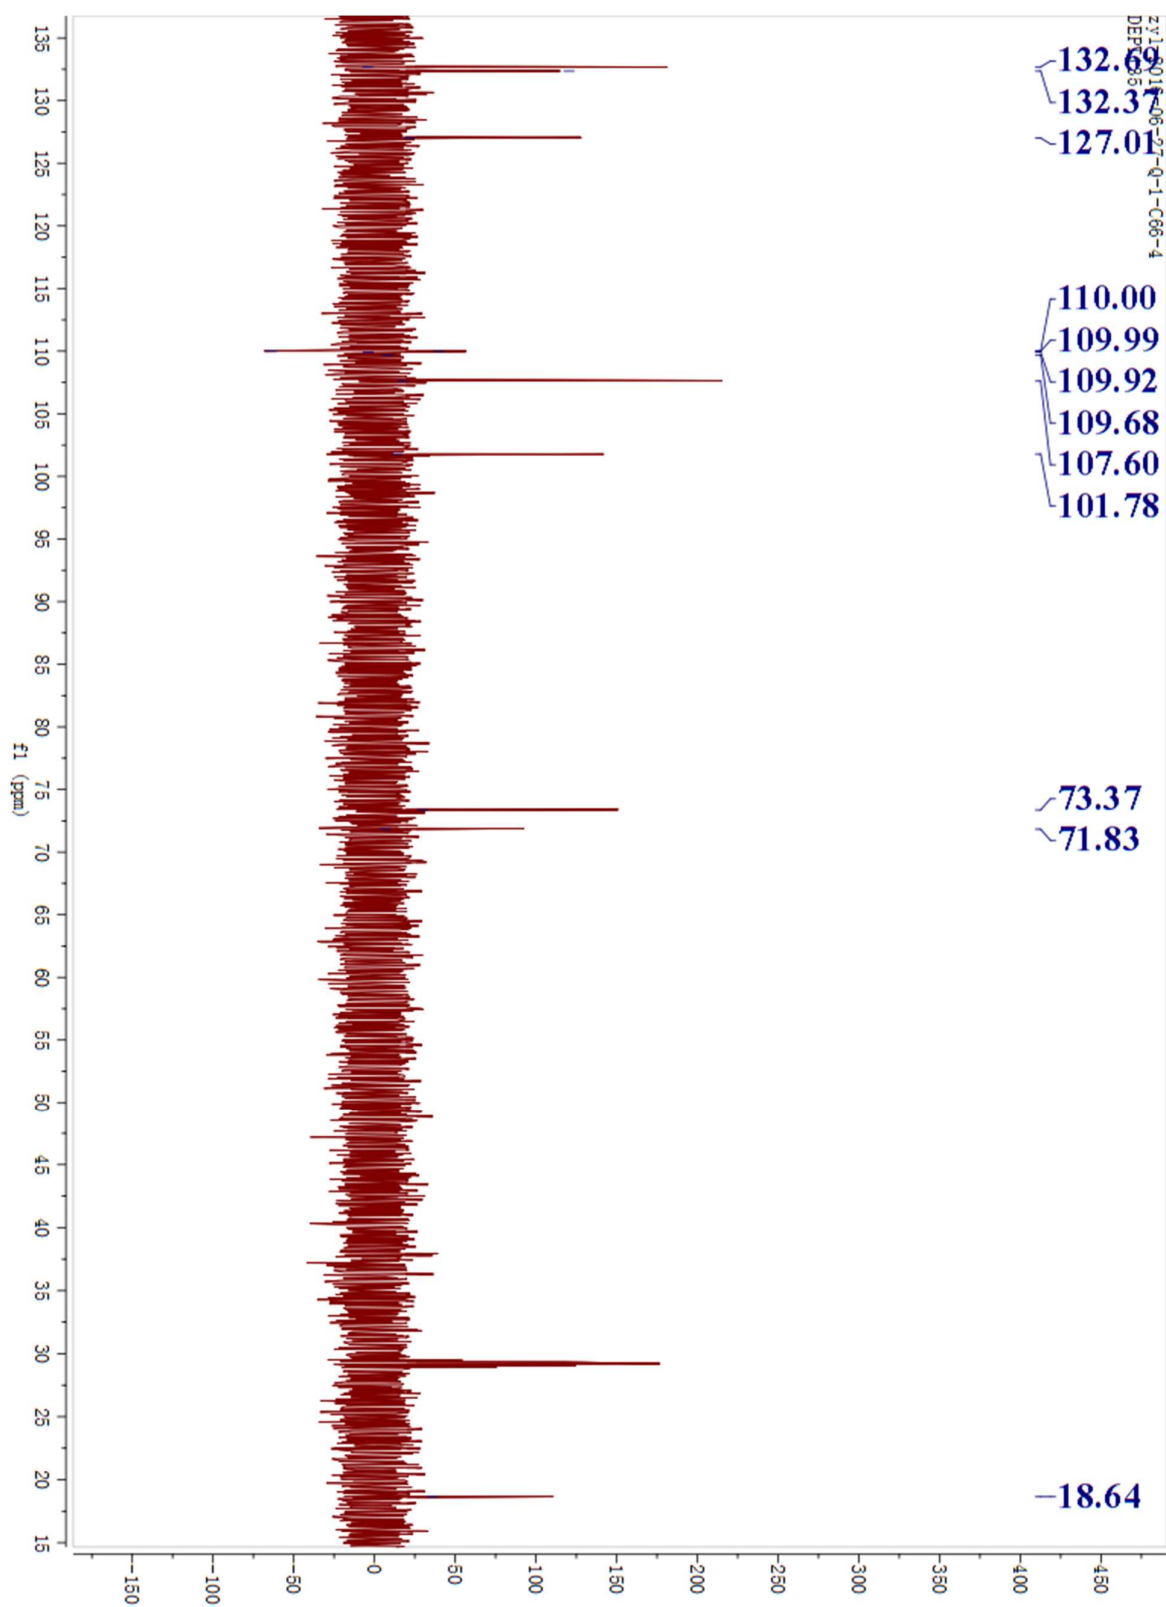

Figure S3. DEPT 135 spectrum of compound **2** in Acetone- $d_6$ .

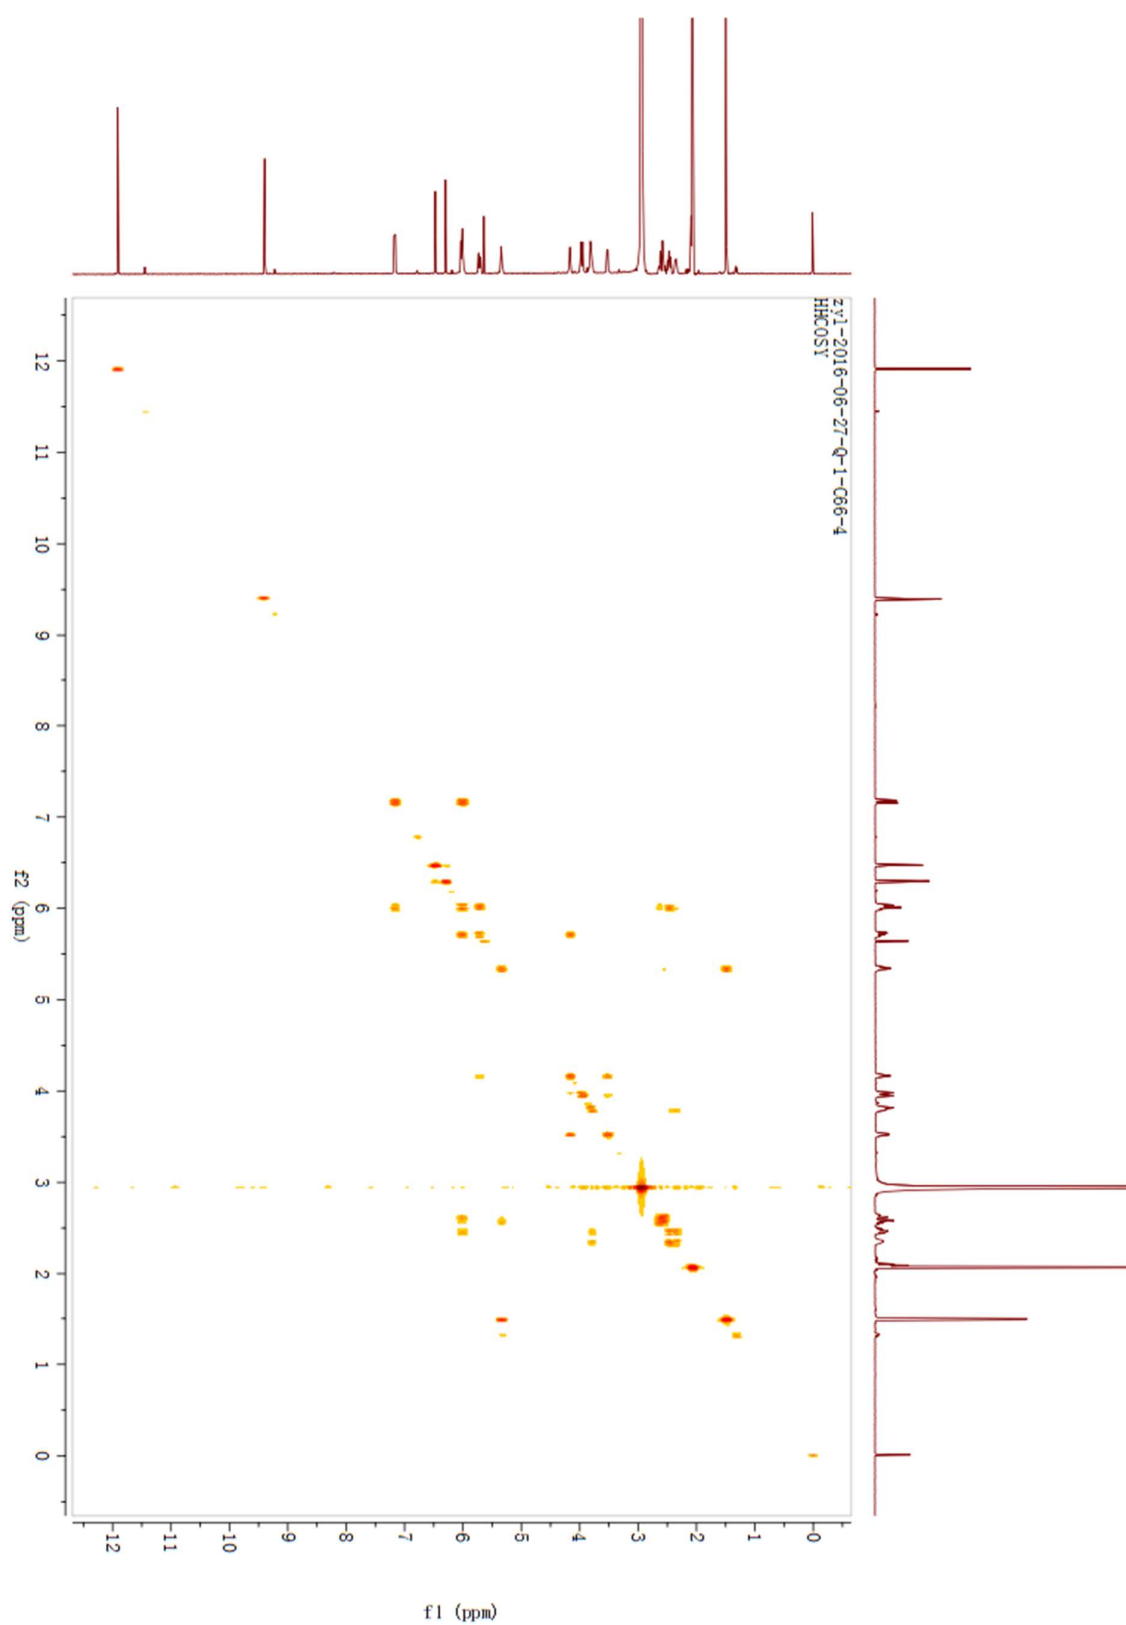

Figure S4.  $^1\text{H}$ - $^1\text{H}$  COSY spectrum of compound **2** in Acetone- $d_6$ .

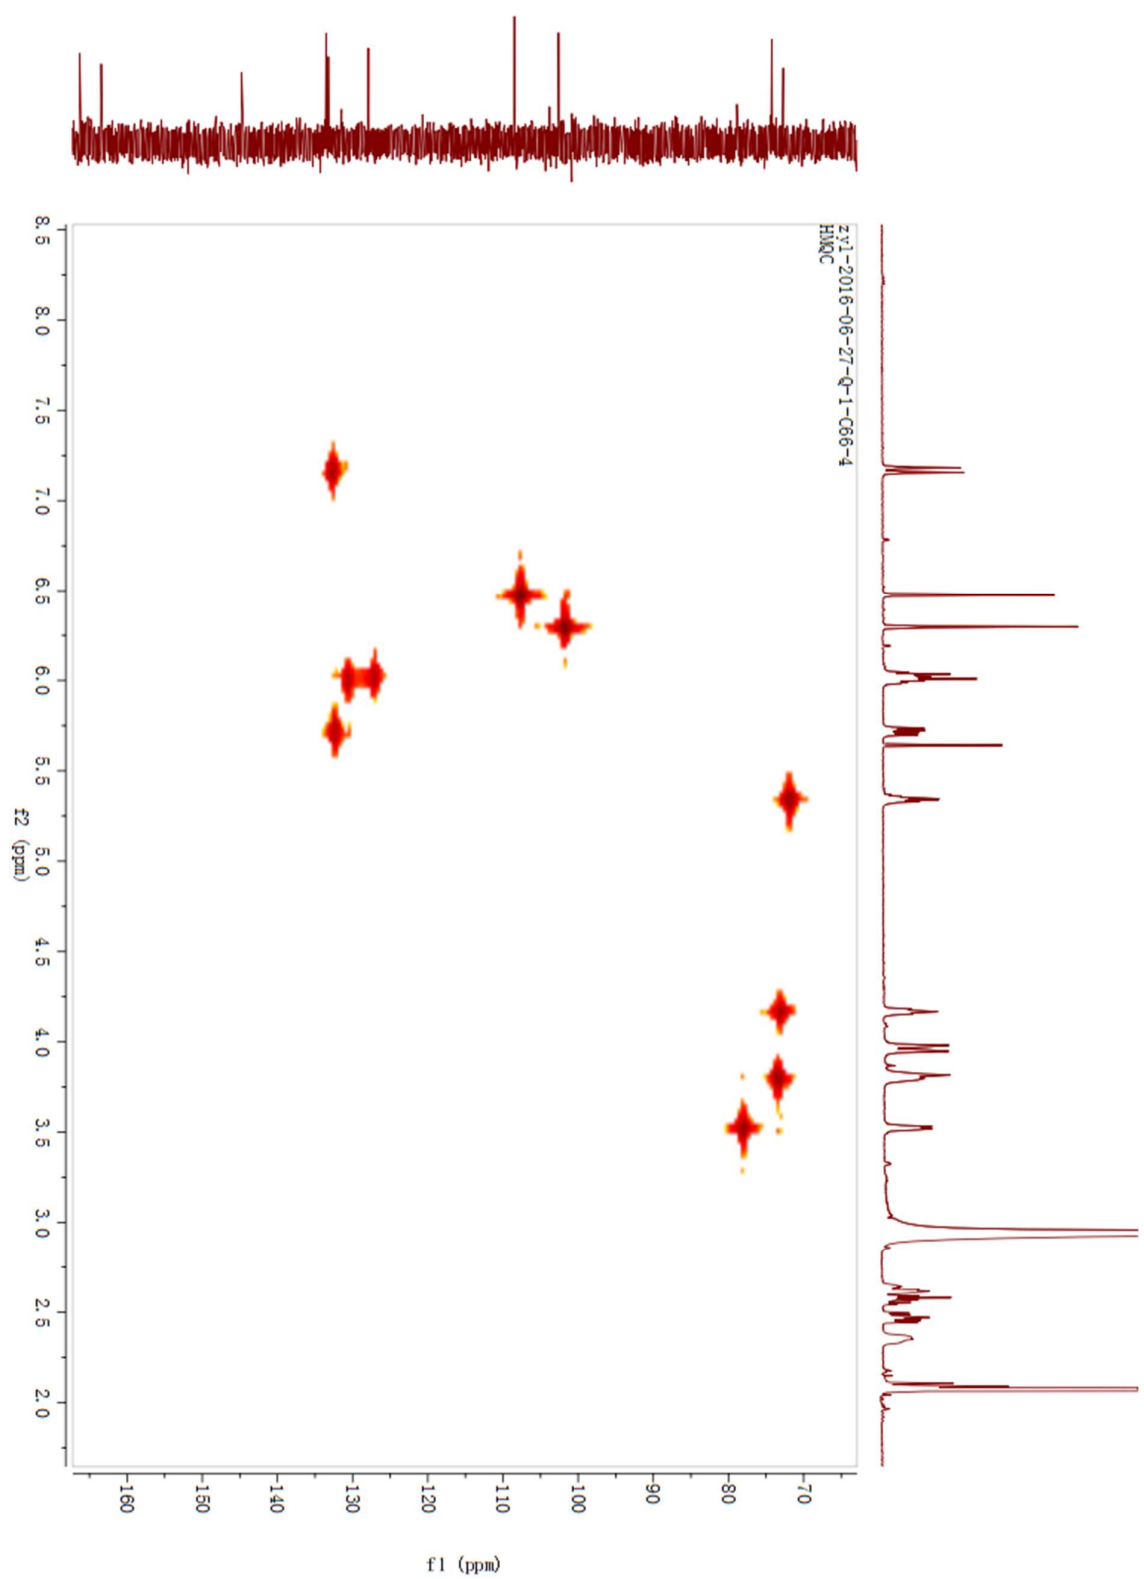

Figure S5. HMQC spectrum of compound **2** in Acetone- $d_6$ .

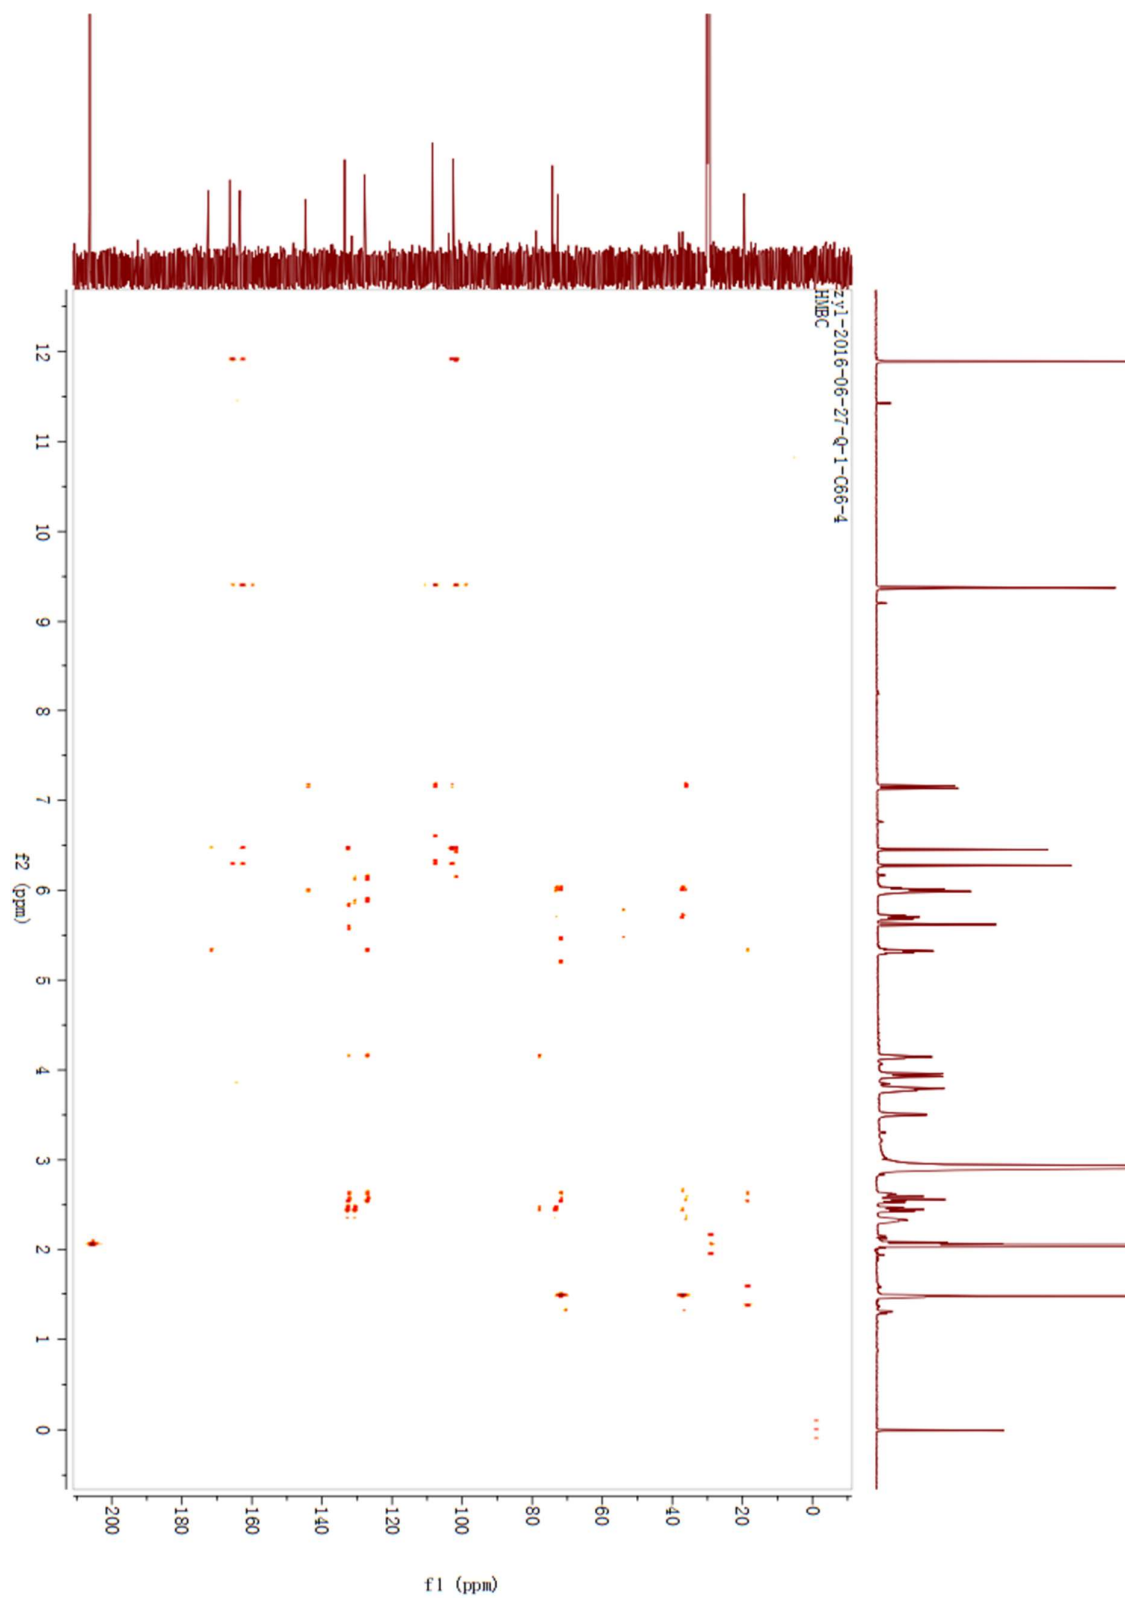

Figure S6. HMBC spectrum of compound **2** in Acetone- $d_6$ .
